# Supplementary material for: Abnormal Olfaction in Parkinson’s Disease Is Related to Faster Disease Progression
Source: Hindawi journal article supplement (doi:10.1155/2015/976589), 2015-01-01
Supplement: f1 [file 976589.f1.pdf]

Normative Sample data: estimated Brief Smell Identification Test scores for percentiles

5, 10, 15, and 20

| Percentiles | Algorithms                                                                                                           |
|-------------|----------------------------------------------------------------------------------------------------------------------|
| 5           | $7.187 - 0.291 \cdot \text{sex} + 0.083 \cdot \text{age} - 0.0013 \cdot \text{age}^2 + 0.055 \cdot \text{education}$ |
| 10          | $6.801 - 0.585 \cdot \text{sex} + 0.110 \cdot \text{age} - 0.0015 \cdot \text{age}^2 + 0.067 \cdot \text{education}$ |
| 15          | $7.408 - 0.919 \cdot \text{sex} + 0.113 \cdot \text{age} - 0.0014 \cdot \text{age}^2 + 0.030 \cdot \text{education}$ |
| 20          | $7.121 - 0.935 \cdot \text{sex} + 0.123 \cdot \text{age} - 0.0014 \cdot \text{age}^2 + 0.038 \cdot \text{education}$ |

Sex: 0-Women, 1-Men

|

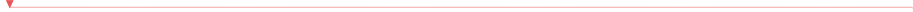

Sara Cavaco 17/12/14 11:16  
**Deleted:** -
